# Supplementary material for: Insulin-producing β-cells regenerate ectopically from a mesodermal origin under the perturbation of hemato-endothelial specification
Source: eLife. 2021 Aug 17;10:e65758. doi: 10.7554/eLife.65758 (PMC8370765; doi:10.7554/eLife.65758)
Supplement: Source data 1. [file elife-65758-data1.xlsx]

## Sheet: Figure 1-soucre data 1
Pancreatic β-cells		Ectopic β-cells
control	npas4l-/-	control	npas4l-/-
14	8	0	9
3	2	0	16
8	7	0	11
5	11	0	21
10	5	0	19
8	4	0	16
10	6	0	18
6	11	0	14
14	12	0	12
1	10	0	18
6	11	0	13
12	16	0	11
7	11	0	5
6	12	0	19
2	11	0	14
9	15	0	20
6	13	0	16
12	13	0	18
5	13	0	22
12		0
15		0
6		0
9		0
6		0

## Sheet: Figure 2-source data 1
Isl1;Insulin;DAPI									neurod1:EGFP;Insulin;DAPI									pdx1:EGFP;Insulin;DAPI
outside of the pancreas				in the pancreas					outside of the pancreas				in the pancreas					outside of the pancreas				in the pancreas
Ins+ only		Ins+Isl1+		Ins+ only		Ins+Isl1+			Ins+ only		Ins+neurod1+		Ins+ only		Ins+neurod1+			Ins+ only		Ins+pdx1+		Ins+ only		Ins+pdx1+
control	npas4l-/-	control	npas4l-/-	control	npas4l-/-	control	npas4l-/-		control	npas4l-/-	control	npas4l-/-	control	npas4l-/-	control	npas4l-/-		control	npas4l-/-	control	npas4l-/-	control	npas4l-/-	control	npas4l-/-
0	0	0	10	0	0	4	8		0	2	0	0	0	2	15	16		0	0	0	2	0	0	5	7
0	0	0	19	0	0	6	10		0	7	0	0	2	0	9	5		0	0	0	0	0	1	3	7
0	0	0	4	0	0	5	7		0	5	0	1	0	0	12	10		0	0	0	1	1	2	6	8
0	0	0	12	0	0	6	12		0	7	0	3	0	0	17	4		0	0	0	1	0	4	2	8
0	0	0	4	0	0	4	11		0	8	0	2	0	0	9	5		0	7	0	2	3	5	3	6
0	0	0	7	0	0	9	4		0	1	0	0	0	0	7	12		0	1	0	4	0	0	3	3
0	0	0	11	0	0	5	4		0	2	0	1	0	0	13	14		0	2	0	1	0	0	2	3
0	0	0	14	0	0	6	17		0	1	0	0	0	0	18	11		0	9	0	0	0	4	3	0
0	0	0	7	0	0	4	6											0	0	0	1	0	0	9	4
0	0	0	10	0	0	1	4											0	4	0	0	0	4	5	11
0	0	0	9	0	0	9	10											0	1	0	4	2	7	2	2
0	0	1	11	0	4	3	9											0	5	0	1	0	3	3	4
0	0	0	0	0	0	4	8											0	3	0	3	3	0	10	5
0	0	0	5	0	0	5	4											0	7	0	2	4	0	5	5
0	0	0	10	0	0	2	2											0	2	0	5	4	2	6	3
0	0	1	22	0	0	12	6											0	0	0	0	0	1	5	4
0	0	0	13	0	0	10	10											0	5	0	0	2	2	5	14
0	0	0	17	0	0	12	3											0	3	0	2	2	1	4	4
0	1	0	10	0	0	12	6											0	4	0	3	0	2	4	3
0	1	0	7	0	0	8	8											0	5	0	6	1	1	6	8
0	1	0	10	0	0	15	8											0	2	0	0	1	6	5	4
0	0	0	15	0	0	13	5											0	13	0	0	0	0	6	5
0	0	0	9	1	0	9	4											0	3	0	2	0	4	7	2
0	0	0	5	0	0	13	14											0	7	0	1	0	1	5	9
0	1	0	9	1	0	9	15											0	5	0	2	1		3
0	0	0	6	0	0	8	16
0	0	0	10	0	0	7	13
0	4	0	7	0	2	12	10
0	0	0	17	0	0	6	11
0	2	0	8	1	0	6	14
0	0	0	19		0		11
0	1	0	10
mnx1:EGFP;Insulin;DAPI									pcsk1:EGFP;ins:mCherry;DAPI									ascl1b:EGFP;Insulin;DAPI
outside of the pancreas				in the pancreas					outside of the pancreas				in the pancreas					outside of the pancreas				in the pancreas
Ins+ only		Ins+mnx1+		Ins+ only		Ins+mnx1+			ins+ only		ins+pcsk1+		ins+ only		ins+pcsk1+			Ins+ only		Ins+ascl1b+		Ins+ only		Ins+ascl1b+
control	npas4l-/-	control	npas4l-/-	control	npas4l-/-	control	npas4l-/-		control	npas4l-/-	control	npas4l-/-	control	npas4l-/-	control	npas4l-/-		control	npas4l-/-	control	npas4l-/-	control	npas4l-/-	control	npas4l-/-
0	0	0	2	0	2	11	9		0	0	0	4	1	1	13	6		0	0	0	1	12	12	3	4
0	2	0	7	3	0	5	7		0	6	0	14	0	0	12	4		0	2	0	1	9	8	3	2
0	0	0	13	2	1	10	9		0	0	0	9	0	0	9	18		0	2	0	0	14	11	0	3
0	4	0	4	0	0	11	6		0	0	0	0	2	2	9	15		0	8	0	2	3	8	2	3
0	3	0	9	2	0	8	6		0	2	2	13	0	0	9	4		0	10	0	1	3	7	2	6
0	1	0	6	3	0	9	6		0	3	0	5	0	3	13	4		0	8	0	2	9	2	3	1
0	1	0	4	4	6	8	10		0	0	0	0	0	3	5	16		0	3	0	1	4	5	0	0
0	1	0	1	5	1	8	9		0	0	0	3	0	0	13	14		0	6	0	2	8	15	2	1
0	3	0	4	2	3	2	9		0	0	0	0	0	0	19	16		0	0	0	1	8	12	5	3
0	0	0	1	5	2	6	5		0	0	2	7	0	1	17	6		0	8	0	0	12	10	3	0
0	0	0	2	1	2	6	4		0	0	0	0	1	1	15	5		0	4	0	0	10	6	4	0
0	6	0	6	2	2	6	12		0	0	0	3	0	3	6	13		0	6	0	0	12	7	4	5
0	1	0	3	2	4	5	8		0	0	0	1	0	3	10	10		0	3	0	2	12	12	6	3
0	2	0	1	2	4	8	4		0	0	0	4	0	0	14	6
0	1	0	6	2	2	2	8		0	1	1	8	0	2	10	8
0	3	0	0	2	2	6	8		4	1	0	3	0	5	5	5
0	1	0	2	1	2	9	0		0	0	3	6	3	1	9	19
0	1	0	1	4	5	4	12		0	1	0	0	1	3	12	9
0	2	0	3	1	3	6	5		0	0	1	1	0	1	9	18
0	1	0	2	4	3	6	5		2	0	0	2	0	2	13	8
0	4	0	6	2	0	9	6		0	5	0	8	1	1	25	9
	2		3		4		1		2	6	1	3	0	2	4	9
	0		6		3		5		1	4	2	12	1	1	3	11
									1	0	1	4	5	1	7	12
									0	2	0	7	5	4	8	10
									0	0	0	4	2	0	6	9
									0	0	0	6	1	0	8	9
									0	5	0	2	1	4	7	1
									0	3	1	2	3	2	13	10
									2	0	0	3	0	1	4	10
									0	6	1	4	2	6	9	10
									0	5	0	5	1	1	0	6
									1		0		0		9
									0		0		3		10
									0		0		0		5
									0		0		0		13
									0		0		1		16
									0		0		1		10
									0		0		1		2
									0		0		0		8

## Sheet: Figure 3-source data 1
Basline				Glucose
Pancreatic		Ectopic		Pancreatic		Ectopic
active	inactive	active	inactive	active	inactive	active	inactive
29	15	38	19	22	22	19	38

## Sheet: Figure 4-source data 1
ins:Flag-NTR;ubi:Switch;drl:CreERT2									ins:Flag-NTR;ubi:Switch;drl:CreERT2
in the pancreas				outside of the pancreas					in the pancreas				outside of the pancreas
Ins+ only		Ins+mCherry+		Ins+ only		Ins+mCherry+			Ins+ only		Ins+mCherry+		Ins+ only		Ins+mCherry+
control	npas4l-/-	control	npas4l-/-	control	npas4l-/-	control	npas4l-/-		control	etsrp MO	control	etsrp MO	control	etsrp MO	control	etsrp MO
6	5	0	0	0	0	0	1		7	19	0	2	0	0	0	2
0	2	0	4	0	0	0	3		9	14	0	0	0	0	0	1
3	6	0	1	0	0	0	0		8	7	0	1	0	0	0	0
11	6	0	2	0	0	0	2		6	3	0	0	0	0	0	2
3	3	2	0	0	0	0	6		14	3	0	0	0	0	0	2
2	0	0	0	0	0	0	10		12	8	0	1	0	0	0	2
0	5	0	0	0	1	0	13		7	10	2	3	0	1	0	2
5	1	0	1	0	0	0	0		5	6	0	1	0	0	0	1
1	3	0	0	0	0	0	12		4	7	0	1	2	0	0	3
3	4	0	2	0	0	0	6		4	6	0	1	0	0	0	5
4	4	0	0	0	0	1	15		5	8	0	2	0	0	0	3
2	8	0	6	0	0	0	1		7	6	0	5	1	0	1	4
0	6	0	1	0	0	0	11		2	6	1	0	0	0	0	5
0	6	0	2	0	0	0	14		5	0	1	0	0	1	0	5
0		0		0		0			3	7	0	0	4	0	0	0
1		0		0		0			6	4	0	3	0	0	0	2
3		0		0		0			10	7	0	0	0	0	0	2
1		0		0		0			9	0	3	0	0	0	0	2
2		0		0		0			5	7	0	1	0	0	0	3
4		0		0		0			4	5	0	1	0	0	0	0
1		1		0					8	6	0	3	0	1	0	2
										14		2		0		1
										7		2		0		1

## Sheet: Figure 5-source data 1
ins:Flag-NTR;ubi:Switch;npas4l:Gal4;UAS:Cre
in the pancreas				outside of the pancreas
Ins+ only		Ins+mCherry+		Ins+ only		Ins+mCherry+
control	npas4ls5/bns423	control	npas4ls5/bns423	control	npas4ls5/bns423	control	npas4ls5/bns423
10	7	2	3	0	3	0	0
4	7	1	5	0	2	0	4
8	0	1	0	0	2	0	2
3	6	2	3	0	3	0	3
8	4	0	0	0	7	0	4
3	10	3	8	0	3	0	2
19	6	1	3	0	3	0	3
14	10	2	2	0	6	0	1
11	7	1	6	0	3	0	3
12	15	1	10	0	2	0	3
8	7	2	5	0	1	0	1
11	14	1	2	0	4	0	1
14	4	0	6	0	4	0	3
8	15	0	3	0	6	0	6
12	11	0	7	0	2	0	0
12	0	2	1	0	0	0	3
6	9	3	2	0	7	0	1
9	4	0	2	0	7	0	1
5	2	2	1	0	9	0	2
6	10	1	4	0	9	0	0
	13		2		6		0

## Sheet: Figure 6-source data 1
ins:Flag-NTR;ubi:Switch;etsrp:Cre
in the pancreas				outside of the pancreas
Ins+ only		Ins+mCherry+		Ins+ only		Ins+mCherry+
control	etsrp MO	control	etsrp MO	control	etsrp MO	control	etsrp MO
9	5	2	0	0	3	0	4
12	7	1	6	0	0	0	1
7	6	0	6	0	1	0	5
10	1	3	5	0	0	0	0
5	4	1	6	0	0	0	2
9	3	2	5	0	0	0	0
9	11	2	5	0	0	0	0
6	5	2	5	0	1	0	2
10	6	0	4	0	0	0	1
7	6	3	3	0	3	0	2
7	10	2	5	0	0	0	1
11	5	3	9	0	0	0	0
11	3	0	9	0	0	0	0
7	8	0	1	0	0	0	5
8	7	4	2	0	1	0	2
12	10	1	1	0	3	0	1
9	12	0	3	0	0	0	2
7	11	5	2	0	1	0	6
10	12	1	6	0	0	0	0
5	4	0	4	0	3	0	6
2	11	0	1	0	1	0	0
7	10	0	6	0	0	0	0
10	7	2	10	0	0	0	1
6	6	1	1	0	0	0	5
5	1	2	0	0	1	0	6
3	4	1	6	0	1	0	1
5	2	2	0	0	2	0	5
4	6	1	3	0	1	0	2
8	7	3	6	0	1	0	3
7	11	2	5	0	0	0	2
11		0		0		0
8		4		0		0
5		1		0		0

## Sheet: Figure 2-supp 1-source data 1
	Pancreatic co-expression in npas4l mutants
	Mean of co-expressed cells	Mean of Ins+ only cells	Mean of total Ins+ cells	Co-expression percentage (%)
Isl1	8.71	0.19	8.9	97.8652
neurod1	9.63	0.25	9.88	97.4696
pdx1	5.38	2.08	7.46	72.118
mnx1	6.7	2.2	8.9	75.2809
pcsk1	9.69	1.69	11.38	85.1494
ascl1b	2.38	8.85	11.23	21.1932
	Ectopic co-expression in npas4l mutants
	Mean of co-expressed cells	Mean of Ins+ only cells	Mean of total Ins+ cells	Co-expression percentage (%)
Isl1	10.22	0.34	10.56	96.7803
neurod1	0.875	4.125	5	17.5
pdx1	1.72	3.52	5.24	32.8244
mnx1	4	1.7	5.7	70.1754
pcsk1	4.47	1.56	6.03	74.1294
ascl1b	1	4.62	5.62	17.7936

## Sheet: Figure 4-supp 4-source data 1
A				B
Ins+ cells outside of the pancreas				Ins+ cells outside of the pancreas
random control MO	etsrp MO1	etsrp MO2		random control MO	etsrp MO1 + control MO	etsrp MO2 + control MO	etsrp MO1 + MO2
0	0	0		0	0	2	2
0	0	3		0	0	1	3
0	0	1		0	0	0	3
0	2	1		0	0	0	0
0	2	1		0	0	0	10
0	1	0		0	0	2	0
0	0	1		0	2	1	0
0	1	0		0	0	0	9
0	0	0			0	0	3
0	0	1				1	0
0	3	1
0	0	0
0	3	5
0	0	2
	2	4
		0
		0

## Sheet: Figure 6-supp 1-source data 1
etsrp:Cre; ubb:LOXP-CFP-LOXP-zgc:114046-mCherry
cells in the intersegmental vessels
kdrl+ only			kdrl+mCherry+			Total kdrl+ cells			kdrl+mCherry+ %
Front	Mid	Tail	Front	Mid	Tail	Front	Mid	Tail	Front	Mid	Tail
3	5	1	60	44	8	63	49	9	95.2381	89.7959	88.8889
2	2	0	40	52	20	42	54	20	95.2381	96.2963	100
2	1	1	30	36	37	32	37	38	93.75	97.2973	97.3684
12	9	9	32	21	14	44	30	23	72.7273	70	60.8696
11	8	5	17	17	21	28	25	26	60.7143	68	80.7692
4	5	1	30	30	27	34	35	28	88.2353	85.7143	96.4286
4	3	0	37	32	16	41	35	16	90.2439	91.4286	100
